# Supplementary figures and images for: Deletion of iRhom2 protects against diet-induced obesity by increasing thermogenesis
Source: PubMed Central journal article supplement — Mol Metab. 2019 Oct 31;31:67–84. doi: 10.1016/j.molmet.2019.10.006 (PMC6909339; doi:10.1016/j.molmet.2019.10.006), 2019-10-31

Supplementary Figure 1 Badenes, M. et al.

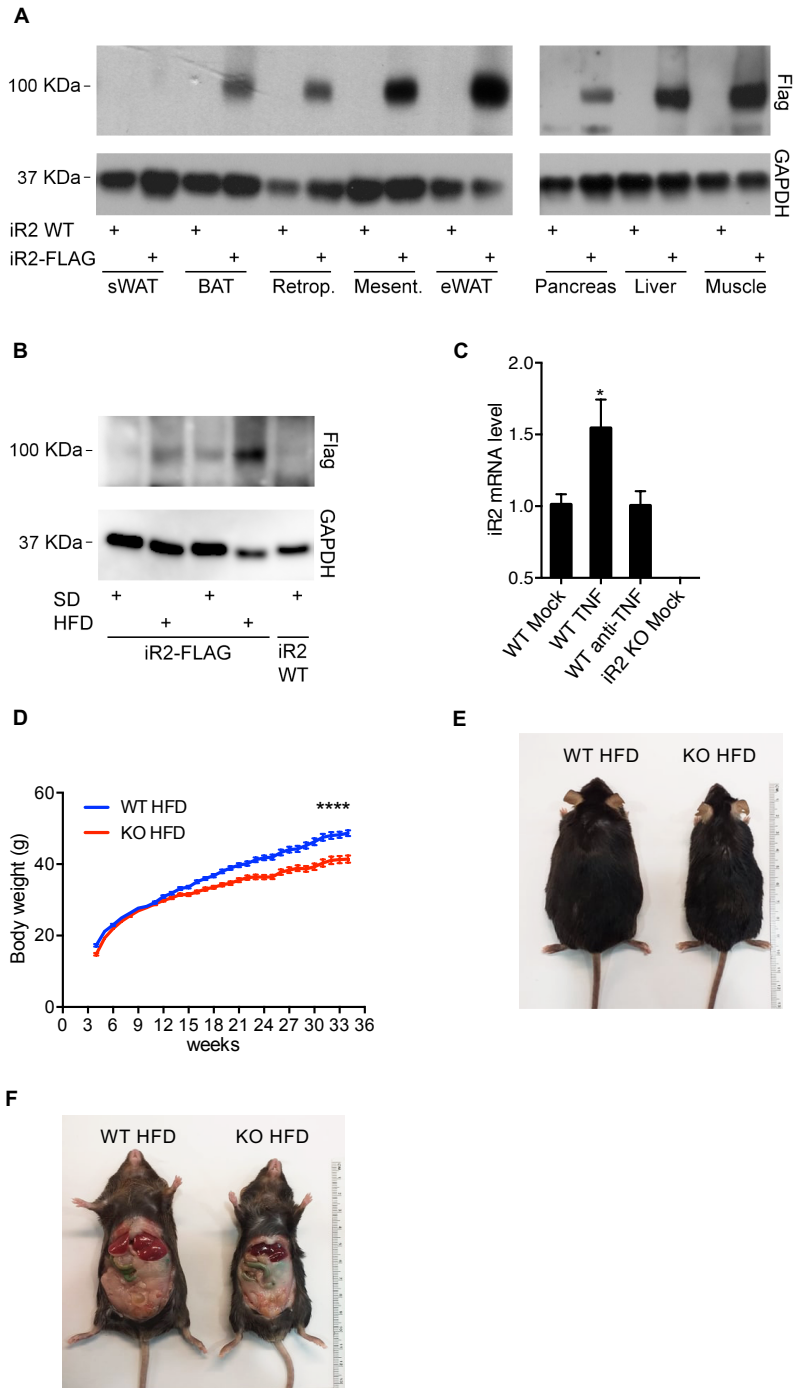

Supplement: mmc1.pdf [file mmc1.pdf]

Supplementary Figure 2 Badenes, M. et al

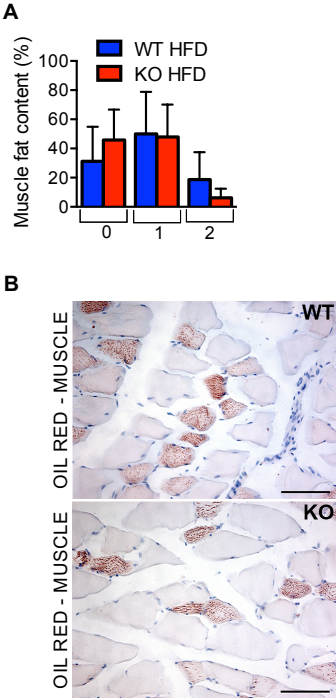

Supplement: mmc2.pdf [file mmc2.pdf]

Supplementary Figure 3 Badenes, M. et al.

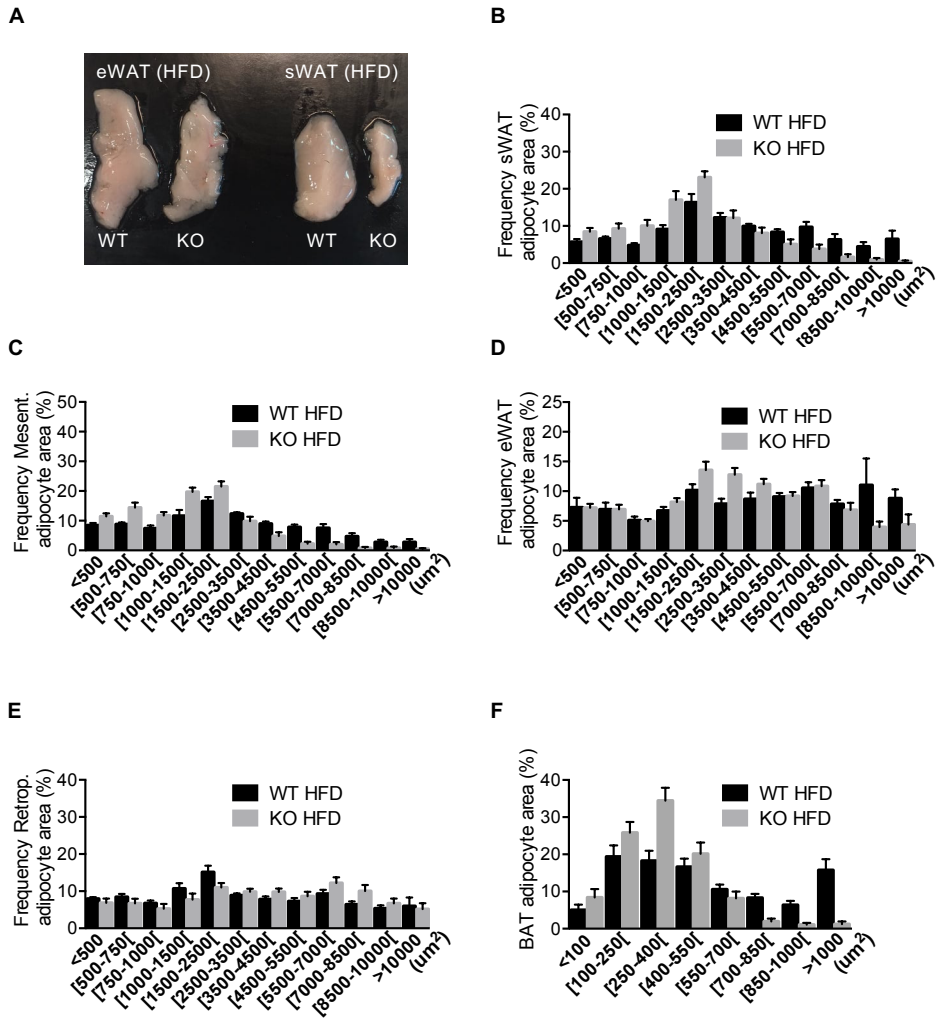

Supplement: mmc3.pdf [file mmc3.pdf]

Supplementary Figure 4 Badenes, M. et al

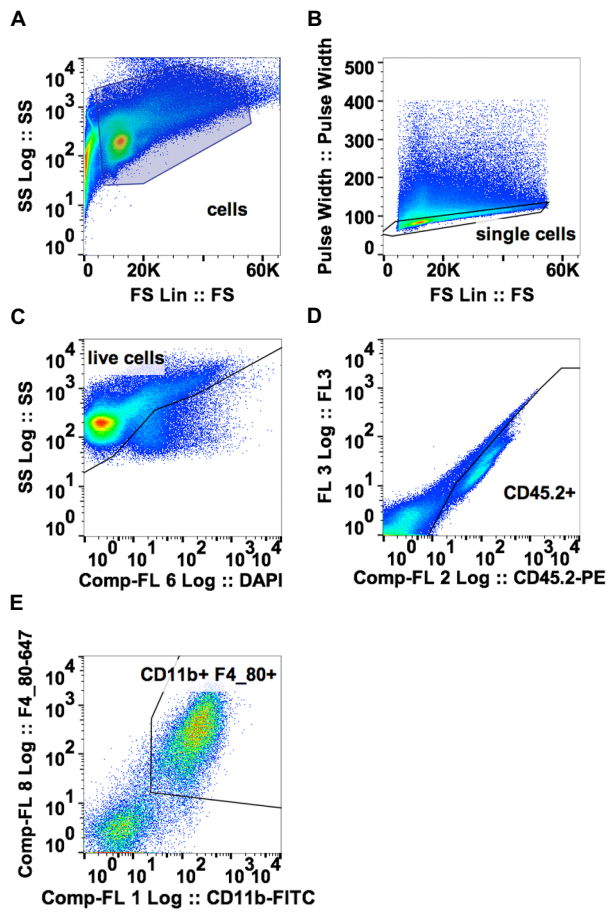

Supplement: mmc4.pdf [file mmc4.pdf]

Supplementary Figure 5 Badenes, M. et al

**A**

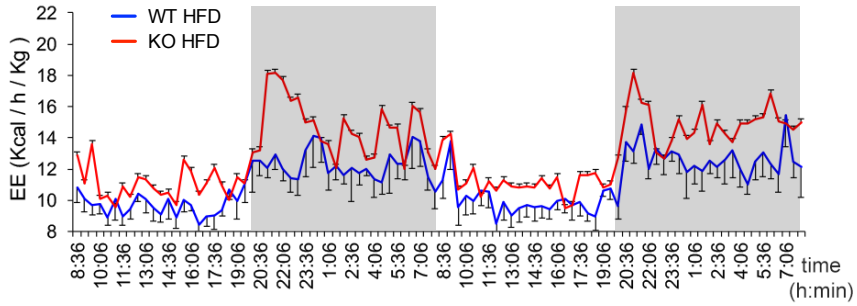

**B**

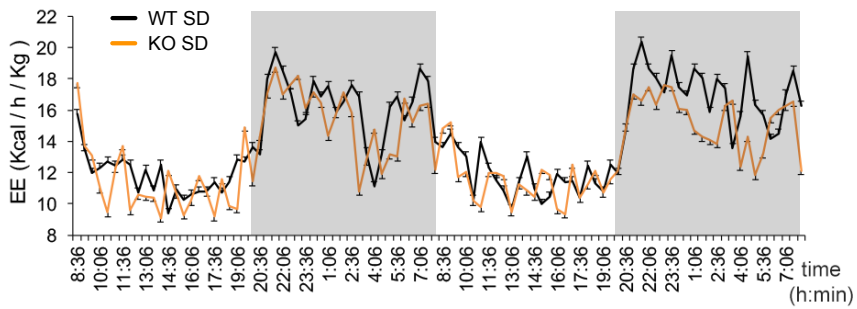

**C**

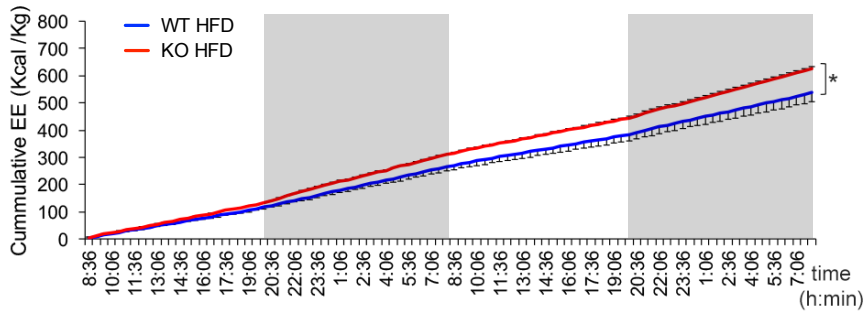

**D**

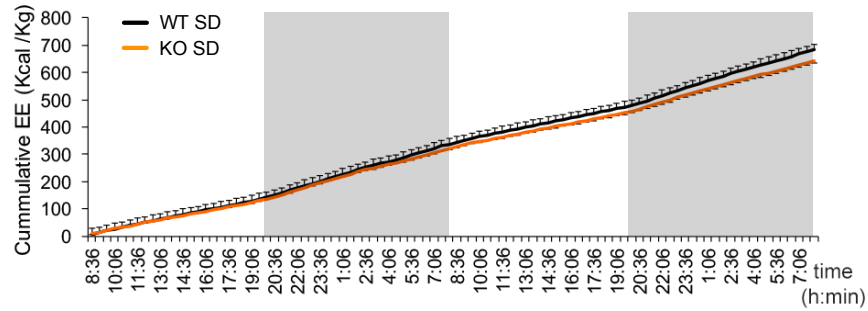

Supplement: mmc5.pdf [file mmc5.pdf]

Supplementary Fig. 6 Badenes, M. et al.

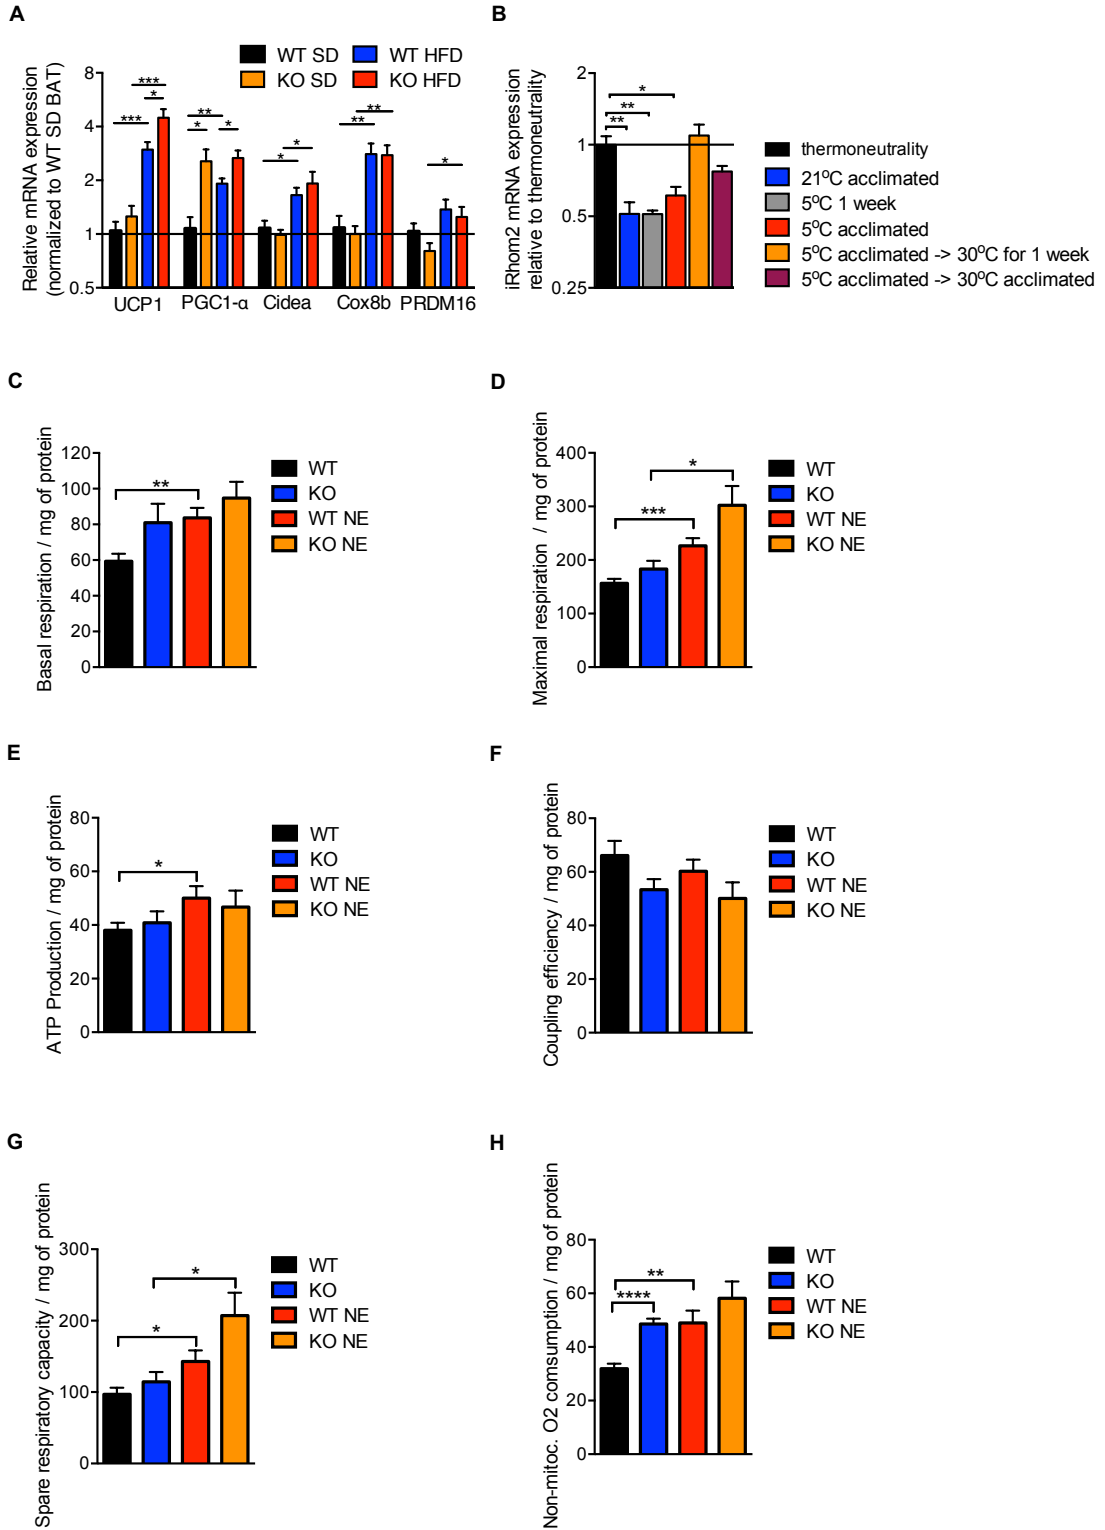

Supplement: mmc6.pdf [file mmc6.pdf]
